# Supplementary material
Source: Elsevier journal article supplement (https://www.sciencedirect.com/science/article/pii/S2341192920300391)
Supplement: mmc1 [file S2341192920300391:mmc1.pdf]

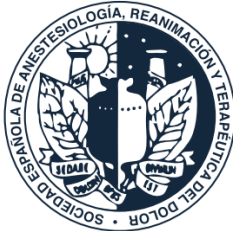

## SOCIEDAD ESPAÑOLA de ANESTESIOLOGÍA, REANIMACIÓN y TERAPÉUTICA DEL DOLOR

José Abascal, 46, 1º A  
28003 Madrid  
Tfnos. y Fax: 914 419 099/  
914 419 699/914 419 321  
E-mail: secretario@sedar.es

### NOTA

A raíz de las informaciones de la existencia de problemas en diferentes comunidades autónomas, en relación con la atención a los pacientes críticos en las Unidades de Reanimación y con la capacitación de los especialistas en Anestesiología y Reanimación para realizar dicha tarea, la Sociedad Española de Anestesiología y Reanimación (SEDAR) desea informar de:

1. Las unidades de reanimación cumplen con la definición de Unidad de Cuidados Intensivos (UCI) recogida en el documento de estándares y recomendaciones de UCI publicadas en 2010 por el Ministerio de Sanidad y Política Social <sup>[1]</sup>, que define la UCI como “una organización de profesionales sanitarios que ofrece asistencia multidisciplinar en un espacio específico del hospital, que cumple unos requisitos funcionales, estructurales y organizativos, de forma que garantiza las condiciones de seguridad, calidad y eficiencia adecuadas para atender pacientes que, siendo susceptibles de recuperación, requieren soporte respiratorio o que precisan soporte respiratorio básico junto con soporte de, al menos, dos órganos o sistemas; así como todos los pacientes complejos que requieran soporte por fallo multiorgánico”, incluyendo además los cuidados postoperatorios.
2. Así mismo, el Real Decreto 69/2015, de 6 de febrero, por el que se regula el Registro de Actividad de Atención Sanitaria Especializada, afirma en su anexo I, 21: “Se considerarán Unidades de Cuidados Intensivos las unidades específicas de cuidados intensivos, ...así como las **Unidades de Reanimación Postquirúrgica** que cuentan con una dotación fija de camas y en las que se realizan ingresos administrativos” <sup>[2]</sup>. Por todo ello, aquellas unidades de reanimación posquirúrgica, en las que se provee de cuidados postoperatorios y donde se realizan las funciones de asistencia multidisciplinar del paciente con fallo o disfunción orgánica, deberían recibir la denominación de **Unidad de Cuidados Intensivos de Anestesia (UCI de Anestesia)**.
3. La UCI de Anestesia está a cargo del servicio de Anestesiología y Reanimación y es atendida por médicos **especialistas anestesiólogos** <sup>[3]</sup> con la **formación y competencias necesarias** para la atención especializada de alta calidad de los pacientes críticos que requieren cuidados intensivos por patología médica o quirúrgica, urgente o programada, según el modelo existente en toda Europa y en muchos hospitales de España (por ejemplo, Hospital Clínic de Barcelona, Hospital General Universitario de Valencia, Clínica Universidad de Navarra, Hospital Universitario de Basurto, POVISA,...). Se ha demostrado que la existencia de médicos anestesiólogos con competencias en cuidados intensivos o **anestesiólogos intensivistas**, otorga un valor añadido al funcionamiento de los hospitales <sup>[4]</sup>.



## SOCIEDAD ESPAÑOLA de ANESTESIOLOGÍA, REANIMACIÓN y TERAPÉUTICA DEL DOLOR

José Abascal, 46, 1º A  
28003 Madrid  
Tfnos. y Fax: 914 419 099/  
914 419 699/914 419 321  
E-mail: secretario@sedar.es

4. La Declaración de Helsinki de Seguridad del Paciente en Anestesiología, publicada en el año 2010 de forma conjunta por la Sociedad Europea de Anestesiología (ESA), la Junta Europea de Anestesiología (EBA) y la Unión Europea de Especialidades Médicas (UEMS) <sup>[5]</sup> establece que la Anestesiología comparte la responsabilidad de la calidad y la seguridad en Anestesia, Cuidados Intensivos, Medicina de Emergencia y Medicina del Dolor, incluido todo el proceso perioperatorio donde la anestesiología representa un continuo en el proceso asistencial del paciente, y también en muchas otras situaciones dentro y fuera del hospital donde el paciente esté en situación crítica y vulnerable.
5. Los cuidados intensivos, y la atención a los pacientes críticos, son una competencia **nuclear y central** de la especialidad de Anestesiología y Reanimación, como se recoge en su programa formativo que define sus competencias, entre otras, en su punto 3º: "Tratar pacientes cuyas funciones vitales estén gravemente comprometidas manteniendo las medidas terapéuticas hasta que se supere la situación de riesgo vital de dichas funciones" <sup>[6]</sup>. Estas competencias son las que definen al **médico intensivista** según el documento de recomendaciones y estándares publicado por el ministerio de Sanidad y Política Social <sup>[1]</sup> como "un profesional médico que tiene una especialidad en atención al paciente crítico y las competencias profesionales para desarrollarla".
6. La SEDAR no desea que los conflictos competenciales entre especialidades médicas generen desconcierto y preocupación falsa en la opinión pública, y considera que deben ser resueltos en su ámbito propio: los colegios de médicos, consejerías de Sanidad y Ministerio de Sanidad.

Agradecemos a los médicos anestesiólogos su trabajo esforzado, generosidad y serenidad en estos momentos en que su actuación ha sido cuestionada.

**FIRMADO:**

**Prof. D. Julián Álvarez Escudero**

**Presidente de la SEDAR**

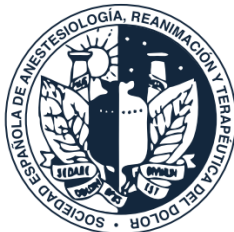

## **SOCIEDAD ESPAÑOLA de ANESTESIOLOGÍA, REANIMACIÓN y TERAPÉUTICA DEL DOLOR**

José Abascal, 46, 1º A  
28003 Madrid  
Tfnos. y Fax: 914 419 099/  
914 419 699/914 419 321  
E-mail: [secretario@sedar.es](mailto:secretario@sedar.es)

[1] Unidad de cuidados intensivos. Estándares y recomendaciones. 2010. Plan de Calidad para el Sistema Nacional de Salud. Ministerio de Sanidad y Política Social. Disponible en: <http://www.mscbs.gob.es/organizacion/sns/planCalidadSNS/docs/UCI.pdf>

[2] Real Decreto 69/2015, de 6 de febrero, por el que se regula el Registro de Actividad de Atención Sanitaria Especializada. Disponible en: <https://www.boe.es/buscar/act.php?id=BOE-A-2015-1235>

[3] Monedero P, Paz-Martín D, Cardona-Pereto J, et al. Cuidados Intensivos de Anestesia: recomendaciones de la Sección de Cuidados Intensivos de la Sociedad Española de Anestesiología. Rev Esp Anestesiología y Reanimación. 2017; 64 (5): 282-285. Disponible en: <https://www.sedar.es/images/site/CUIDADOS-INTENSIVOS-SEDAR.pdf>

[4] Khanna AK, Siddiqui S, Kaufman M, Grecu L. Anesthesiologist Intensivists: Adding Value to a Hospital System. ASA Monitor. 2019; 83 (5):18-20. Disponible en: <https://monitor.pubs.asahq.org/article.aspx?articleid=2731651>

[5] Mellin-Olsen J, Staender S, Whitaker DK, Smith AF. The Helsinki Declaration on Patient Safety in Anaesthesiology. Eur J Anaesthesiol 2010; 27:592-7.

[6] Programas Formativos de Especialidades en Ciencias de la Salud. Anestesiología y Reanimación. Ministerio de Sanidad, Consumo y Bienestar Social. Disponible en : [https://www.mscbs.gob.es/profesionales/formacion/docs/Anestesiologia\\_y\\_Reanimacion.pdf](https://www.mscbs.gob.es/profesionales/formacion/docs/Anestesiologia_y_Reanimacion.pdf)
